# Supplementary material
Source: publisher figshare collection journal article supplement (https://karger.figshare.com/ndownloader/files/24100895)
Supplement: Supplementary file 1 [file 24100895]

**Supplementary Table 1. Characteristics according to line of therapy in Child-Pugh A group**

| **Characteristics** | **First line (n=57)** | **Second or later lines (n=17)** | ***p*-value** |
| --- | --- | --- | --- |
| **Age, years, mean±SD** | 60.3 ± 11.0 | 57.7 ± 8.6 | 0.385 |
| **Gender, male** | 47 (82.5%) | 11 (64.7%) | 0.119 |
| **Etiology** |  |  | 0.282 |
| Hepatitis B | 37 (64.9%) | 14 (82.4%) |  |
| Hepatitis C | 10 (17.5%) | 0 |  |
| Alcohol | 5 (8.8%) | 1 (5.9%) |  |
| Unknown | 5 (8.8%) | 2 (11.8%) |  |
| **BCLC stage, B/C** |  |  | 0.810 |
| B | 8 (14.0%) | 2 (11.8%) |  |
| C | 49 (86.0%) | 18 (88.2%) |  |
| **Tumor extent** |  |  |  |
| Extrahepatic metastasis | 34 (59.6%) | 14 (82.4%) | 0.146 |
| Macrovascular invasion | 20 (35.1%) | 10 (58.8%) | 0.080 |
| Main portal vein invasion | 9 (15.8%) | 4 (23.5%) | 0.480 |
| Bile duct invasion | 4 (7.0%) | 2 (11.8%) | 0.616 |
| Tumor occupying ≥ 50% of the liver | 15 (26.3%) | 2 (11.8%) | 0.327 |
| **Baseline serum alpha fetoprotein > 200 ng/ml** | 26 (45.6%) | 11 (64.7%) | 0.167 |
| **Maximum intrahepatic tumor size (mm), mean±SD** | 54 ± 49 | 46 ± 33 | 0.510 |
| **Subsequent treatment after lenvatinib** | 23 (56.1%) | 5 (33.3%) | 0.227 |

SD; standard deviation, BCLC; Barcelona Clinic Liver Cancer

**Supplementary Table 2. Characteristics patients according to subsequent treatment after lenvatinib**

| **Characteristics** | **Subsequent treatment, yes**  **(n=32)** | **Subsequent treatment, no**  **(n=27)** | ***p*-value** |
| --- | --- | --- | --- |
| **Age, years, mean±SD** | 57.6 ± 12.4 | 59.0 ± 10.8 | 0.647 |
| **Gender, male** | 22 (68.8%) | 21 (77.8%) | 0.437 |
| **Etiology** |  |  | 0.832 |
| Hepatitis B | 23 (71.9%) | 21 (77.8%) |  |
| Hepatitis C | 3 (9.4%) | 3 (11.1%) |  |
| Alcohol | 3 (9.4%) | 1 (3.7%) |  |
| Unknown | 3 (9.4%) | 2 (7.4%) |  |
| **BCLC stage, B/C** |  |  | 0.362 |
| B | 4 (12.5%) | 1 (3.7%) |  |
| C | 28 (87.5%) | 26 (96.3%) |  |
| **Child-Pugh class** |  |  | 0.035 |
| A | 28 (87.5%) | 17 (63.0%) |  |
| B | 4 (12.5%) | 10 (37.0%) |  |
| **Tumor extent** |  |  |  |
| Extrahepatic metastasis | 20 (62.5%) | 19 (70.4%) | 0.525 |
| Macrovascular invasion | 11 (34.4%) | 14 (51.9%) | 0.176 |
| Main portal vein invasion | 4 (12.5%) | 7 (25.9%) | 0.315 |
| Bile duct invasion | 2 (6.3%) | 7 (25.9%) | 0.066 |
| Tumor occupying ≥ 50% of the liver | 6 (18.8%) | 9 (33.3%) | 0.200 |
| **Baseline serum alpha fetoprotein > 200 ng/ml** | 19 (59.4%) | 18 (66.7%) | 0.564 |
| **Maximum intrahepatic tumor size (mm), mean±SD** | 44 ± 40 | 74 ± 53 | 0.018 |

SD; standard deviation, BCLC; Barcelona Clinic Liver Cancer
